# Supplementary material
Source: PubMed Central journal article supplement (PMC9810330)
Supplement: NIHMS1854214-supplement-Figure_S1___Supplementary_Figure_1.pdf [file NIHMS1854214-supplement-Figure_S1___Supplementary_Figure_1.pdf]

### MALES

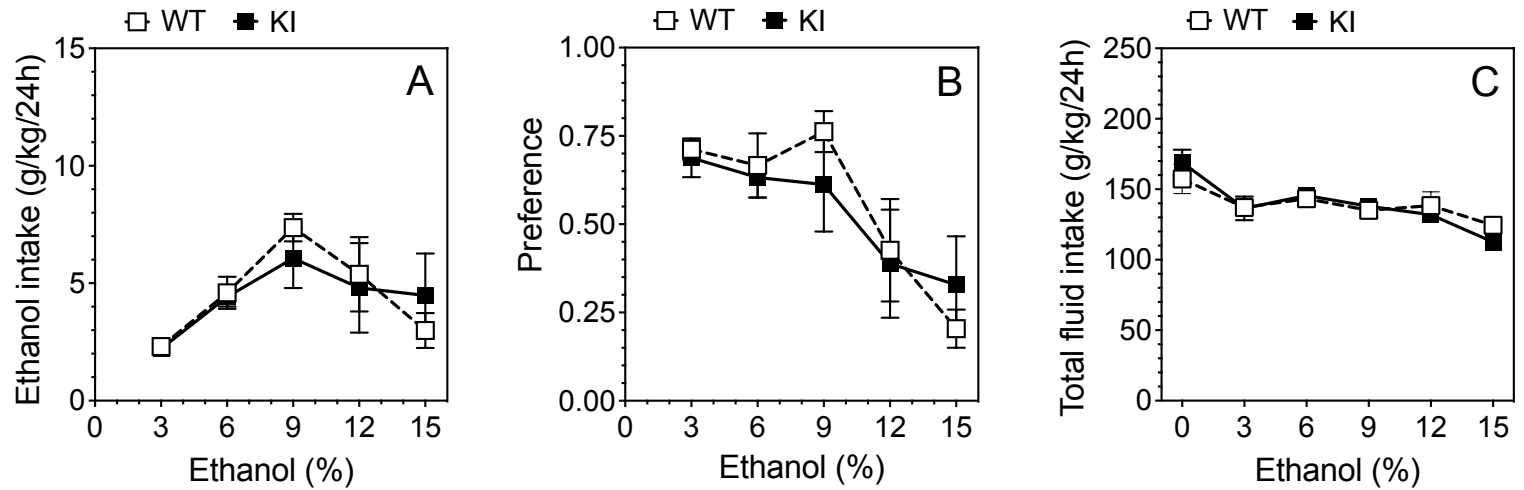

### FEMALES

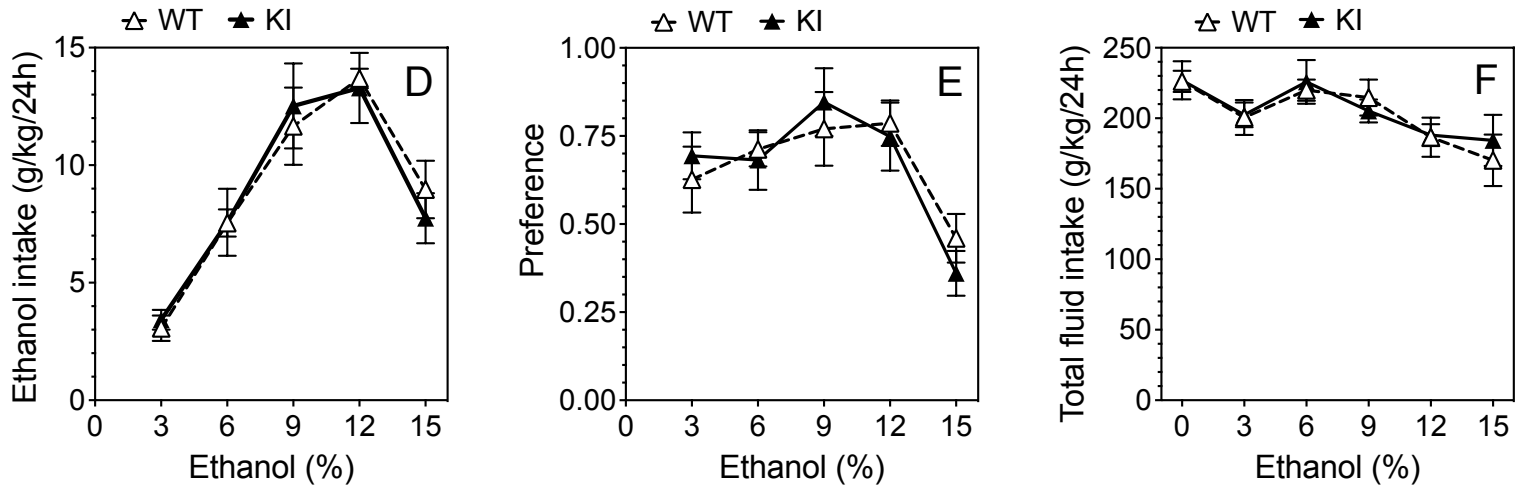

**Figure S1. Two-bottle choice ethanol drinking does not differ in wild-type and  $\beta 3$ -S408/409A mice.** Mice were offered increasing concentrations of ethanol (3-15% v/v). Each data point represents the average of four drinking days at each concentration of ethanol. (A, D) Ethanol intake (g/kg/24h), (B, E) preference for ethanol, and (C, F) total fluid intake (g/kg/24h) in male (A-C, n = 5 per group) and female (D-F, n = 5 per group) wild-type (WT) and  $\beta 3$ -S408/409A knock-in (KI) mice.
