# Supplementary material
Source: PubMed Central journal article supplement (PMC9810330)
Supplement: NIHMS1854214-supplement-Figure_S2___Supplementary_Figure_2.pdf [file NIHMS1854214-supplement-Figure_S2___Supplementary_Figure_2.pdf]

## MALES

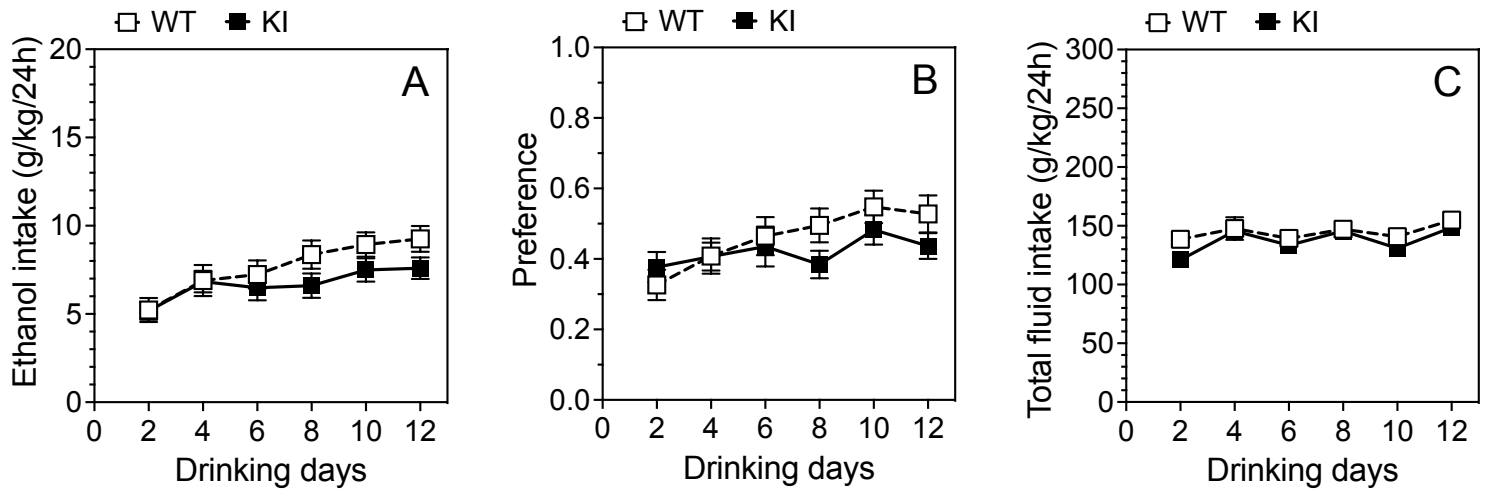

## FEMALES

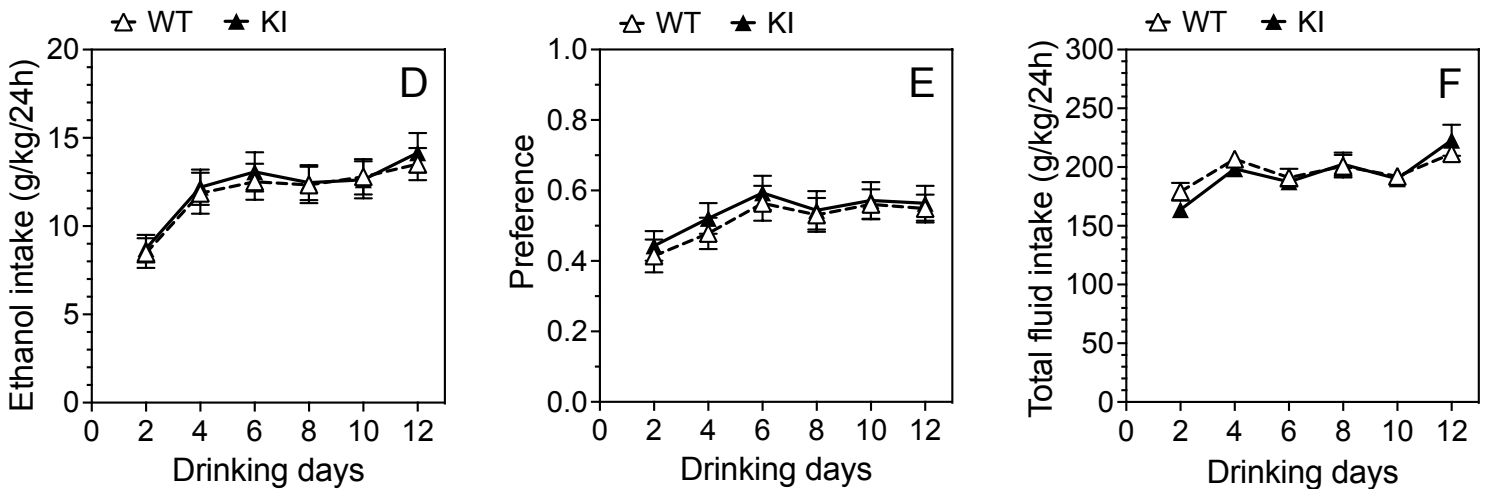

**Figure S2. Two-bottle choice every-other-day ethanol drinking does not differ in wild-type and  $\beta 3$ -S408/409A mice.** Mice were offered ethanol (15% v/v) every-other-day, and each data point represents the average of two drinking days. (A, D) Ethanol intake (g/kg/24h), (B, E) preference for ethanol, and (C, F) total fluid intake (g/kg/24h) in male (A-C, n = 16 per group) and female (D-F, n = 16 per group) wild-type (WT) and  $\beta 3$ -S408/409A knock-in (KI) mice.
